# Supplementary material
Source: PubMed Central journal article supplement (PMC3875168)
Supplement: NIHMS528834-supplement-1_si_001.pdf [file NIHMS528834-supplement-1_si_001.pdf]

# Supporting Information

## Substrate-based Fragment Identification for the Development of Selective, Nonpeptidic Inhibitors of Striatal-Enriched Protein Tyrosine Phosphatase

Tyler D. Baguley, Hai-Chao Xu, Manavi Chatterjee, Paul J. Lombroso, and Jonathan A. Ellman

### Table of Contents

|                                                                              |     |
|------------------------------------------------------------------------------|-----|
| 1. Analytical data for $K_i$ determination.                                  | S2  |
| 2. NMR spectra for inhibitors <b>12s</b> and <b>12t</b> .                    | S23 |
| 3. Table of primary and secondary antibodies used for western blot analysis. | S25 |
| 4. BBB PAMPA results for <b>12s</b> .                                        | S26 |

**1. Analytical data for  $K_i$  determination.**

Each inhibitor  $K_i$  value was determined using at least 2 independent measurements. The same inhibitor stock solutions were used for each measurement. Dose-response curves are provided for each inhibitor. Non-linear regression analysis was accomplished in Prism (GraphPad) using single site competitive inhibition.

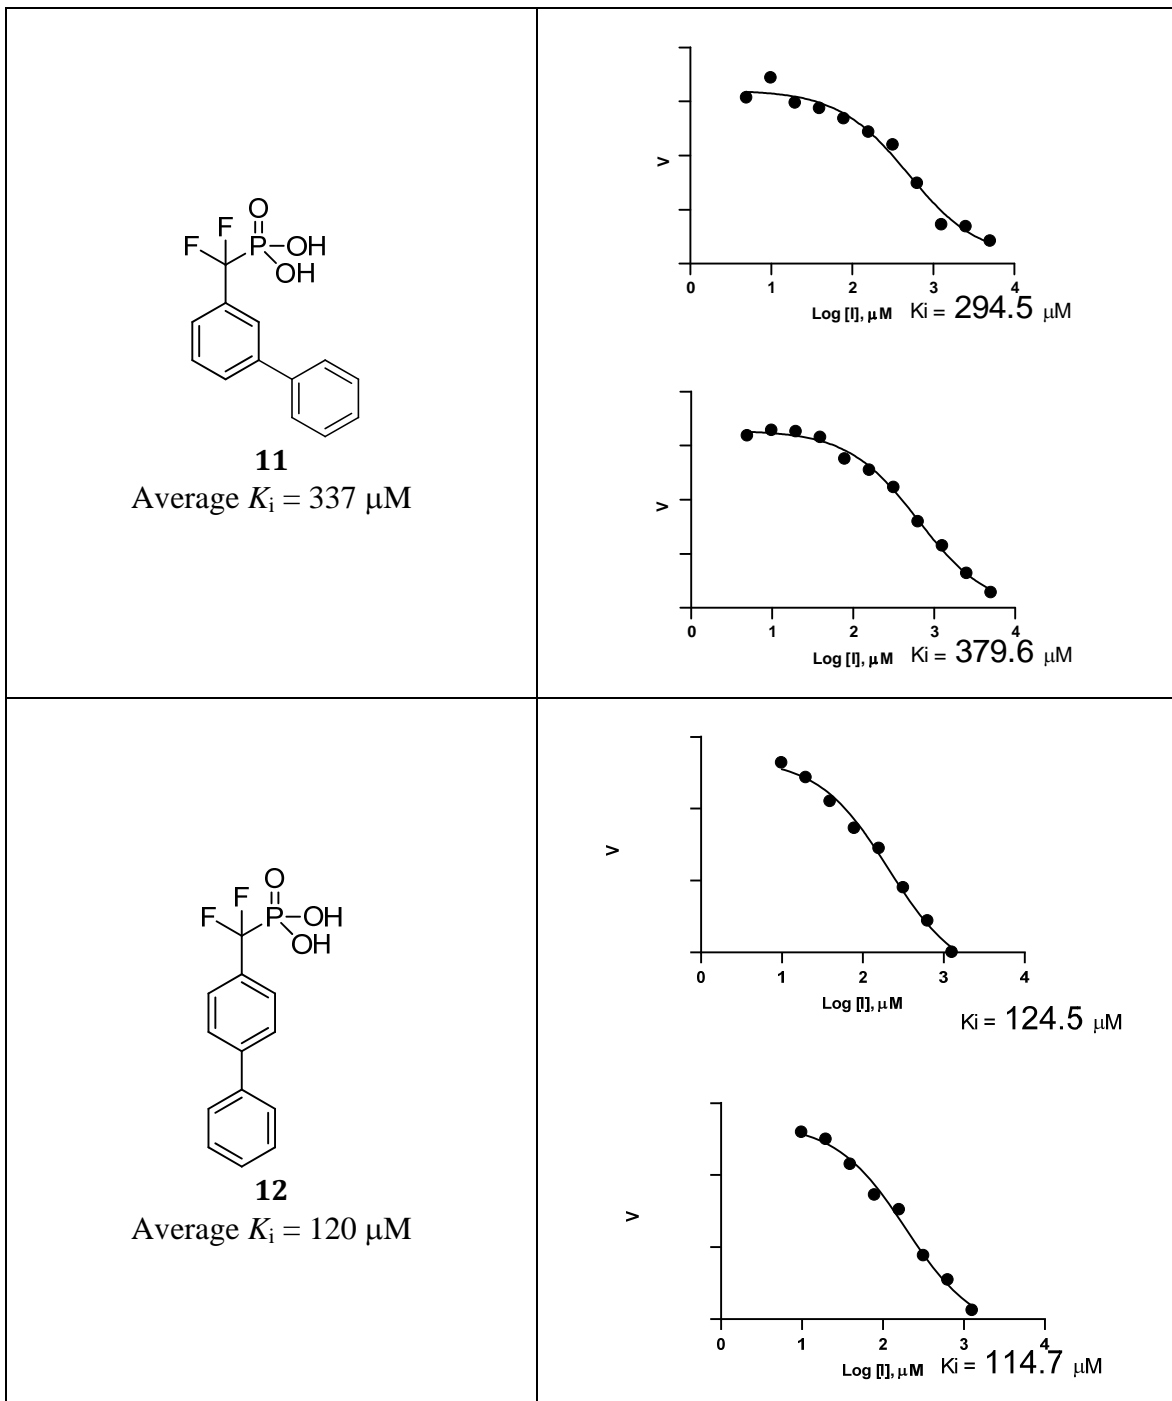

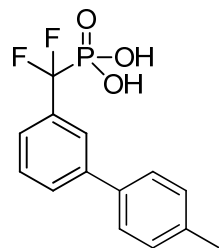

**11a**

Average  $K_i = 205 \mu\text{M}$

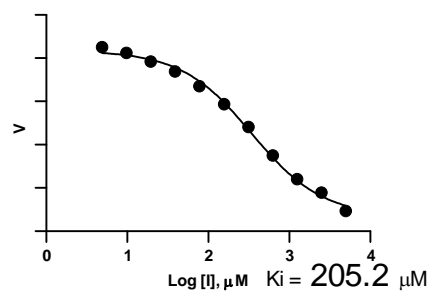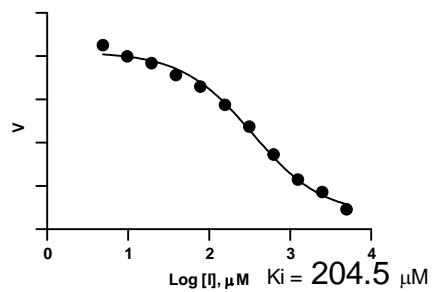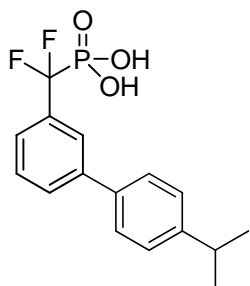

**11b**

Average  $K_i = 222 \mu\text{M}$

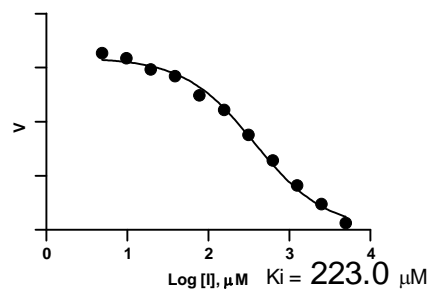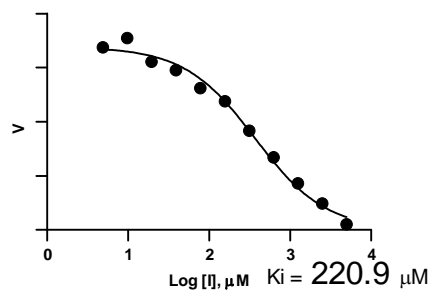

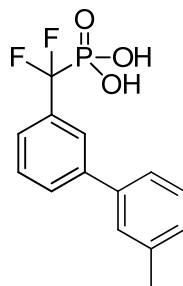

**11c**  
Average  $K_i = 137 \mu\text{M}$

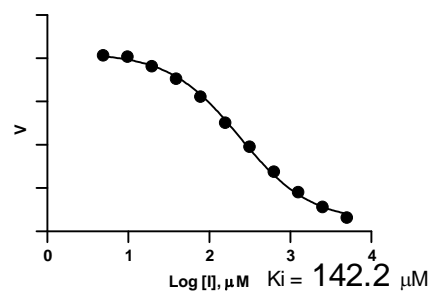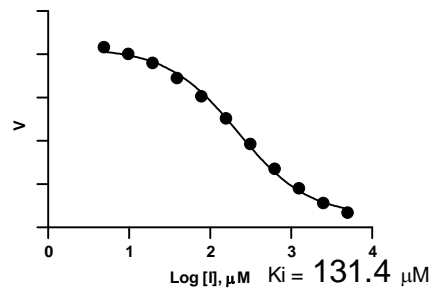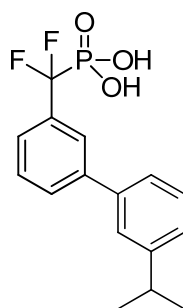

**11d**  
Average  $K_i = 81 \mu\text{M}$

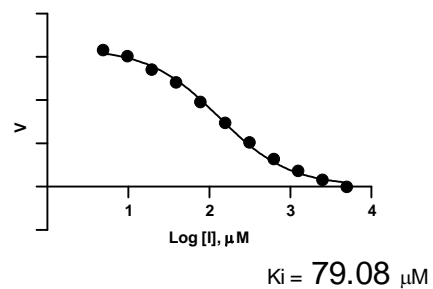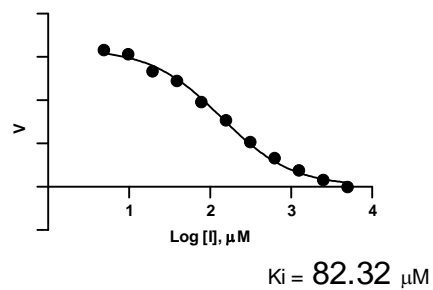

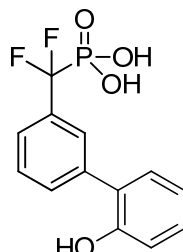

**11e**

Average  $K_i = 168 \mu\text{M}$

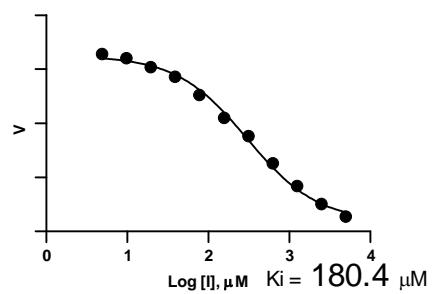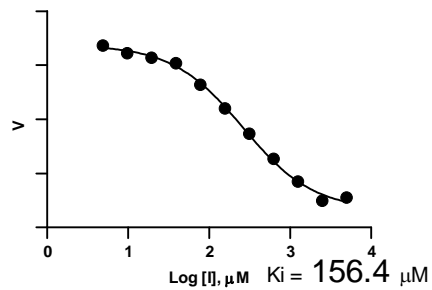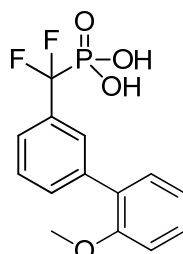

**11f**

Average  $K_i = 271 \mu\text{M}$

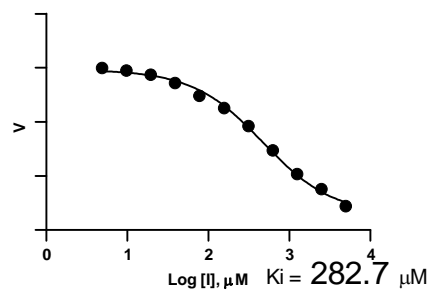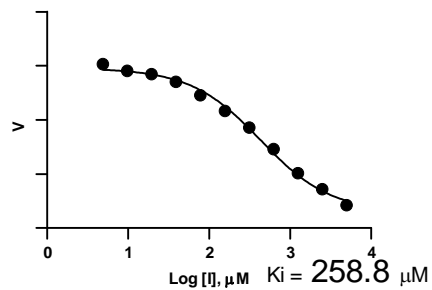

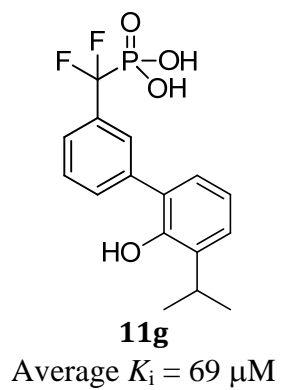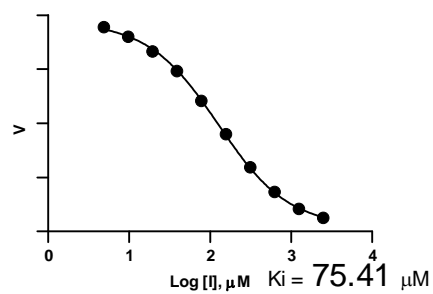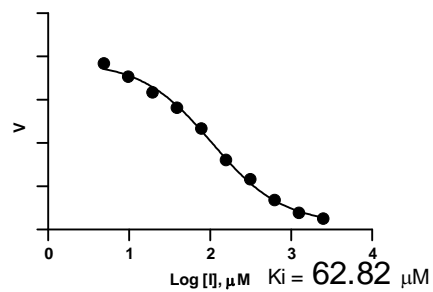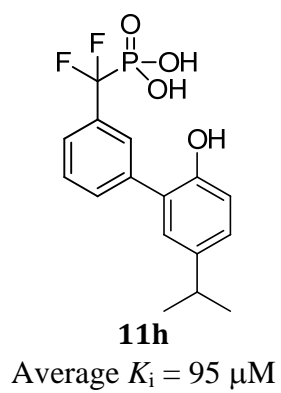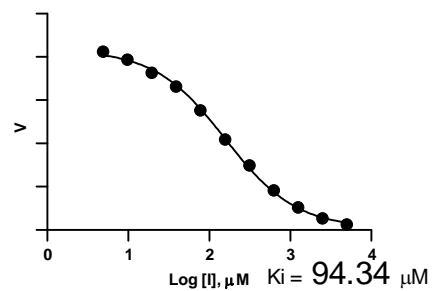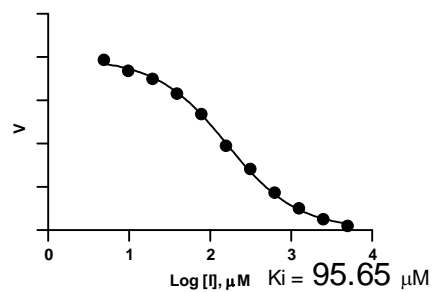

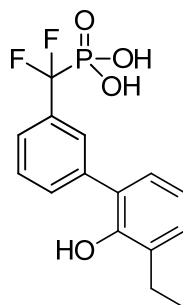

**11i**

Average  $K_i = 124 \mu\text{M}$

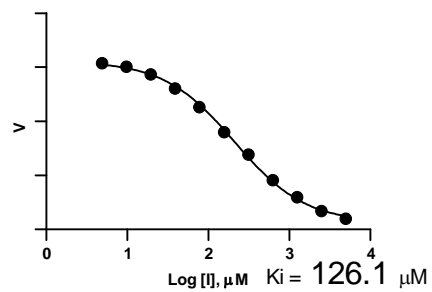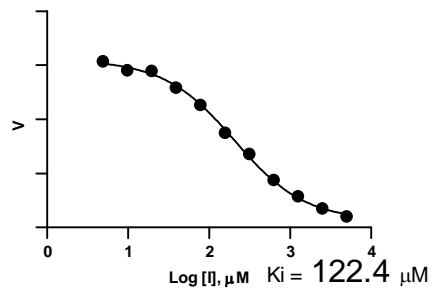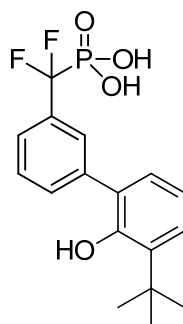

**11j**

Average  $K_i = 63 \mu\text{M}$

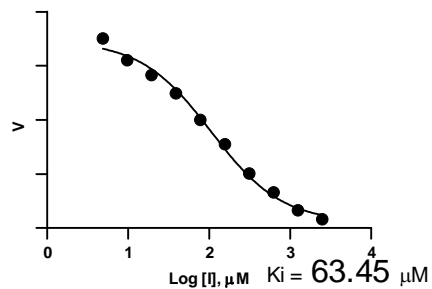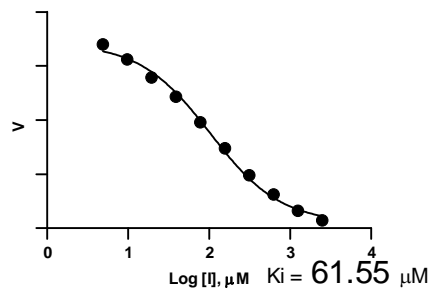

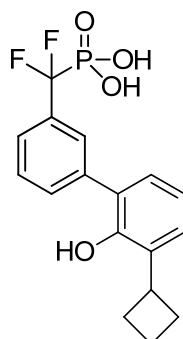

**11k**  
Average  $K_i = 45 \mu\text{M}$

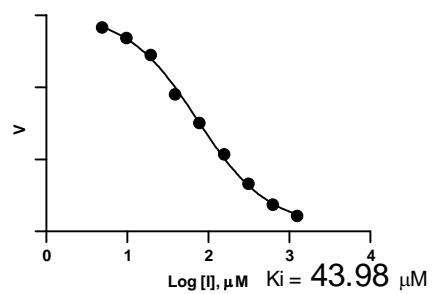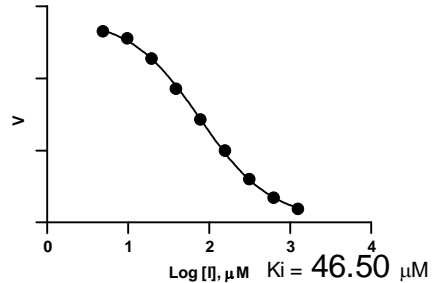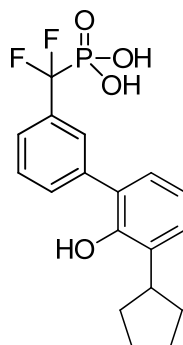

**11l**  
Average  $K_i = 25 \mu\text{M}$

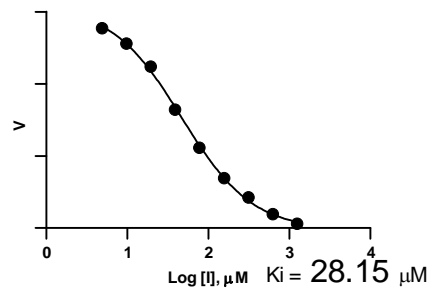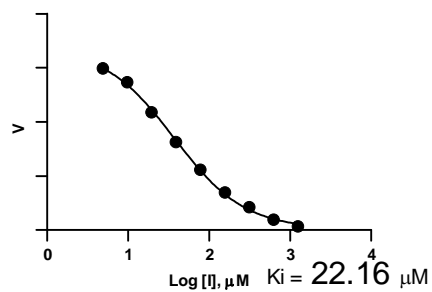



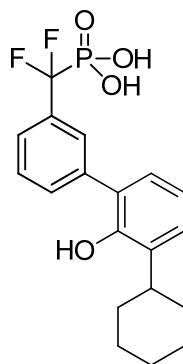

**11m**  
Average  $K_i = 20 \mu\text{M}$

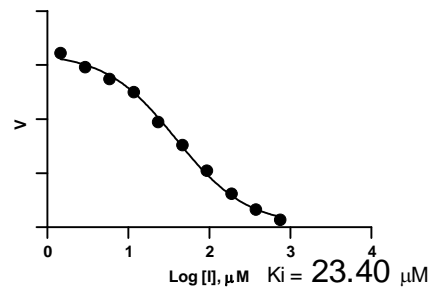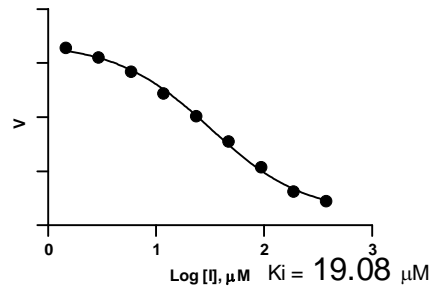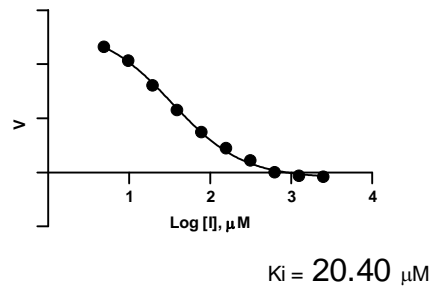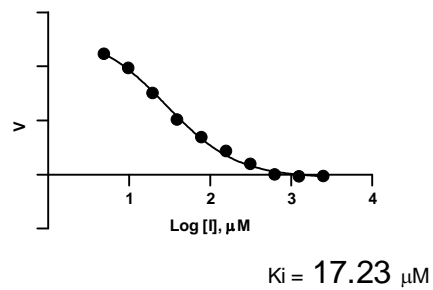

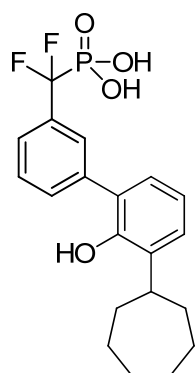

**11n**  
Average  $K_i = 62 \mu\text{M}$

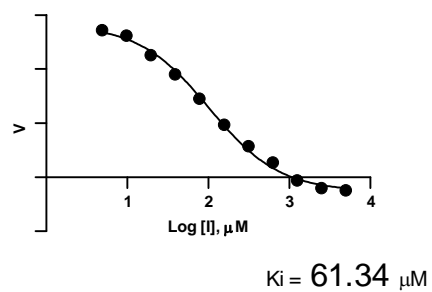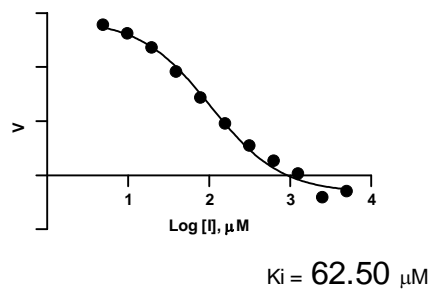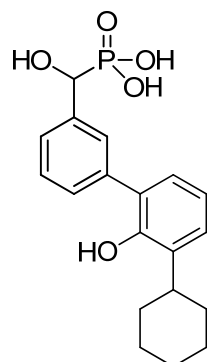

**11o**  
Average  $K_i = 36 \mu\text{M}$

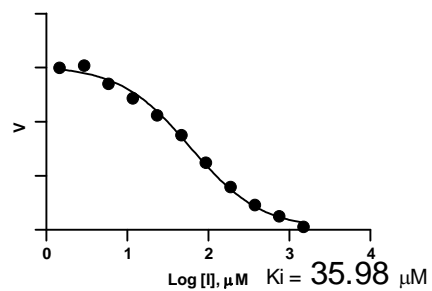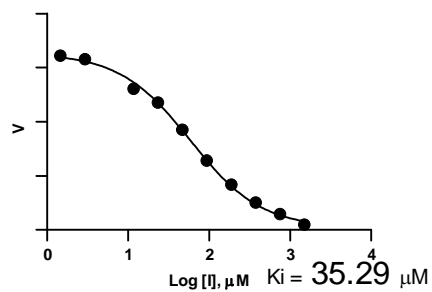

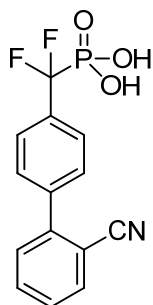

**12a**

Average  $K_i = 375 \mu\text{M}$

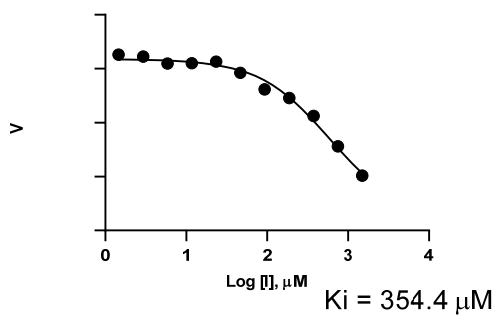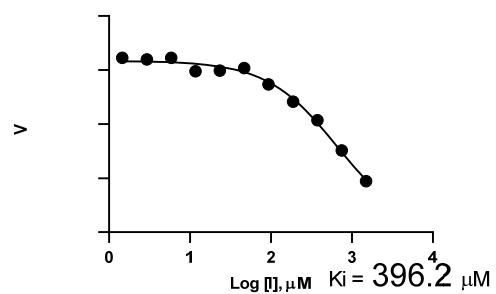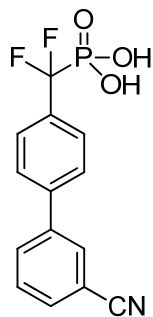

**12b**

Average  $K_i = 399 \mu\text{M}$

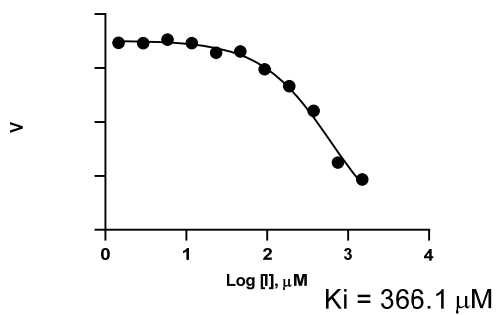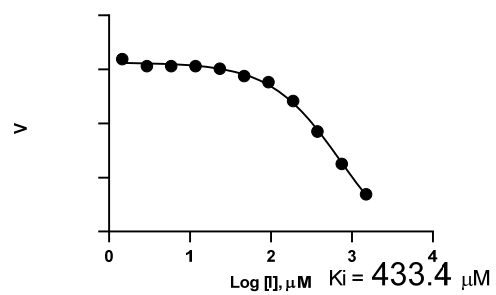

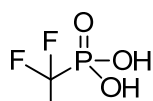

**12c**

Average  $K_i = 617 \mu\text{M}$

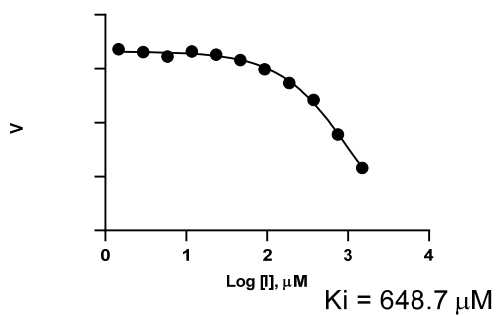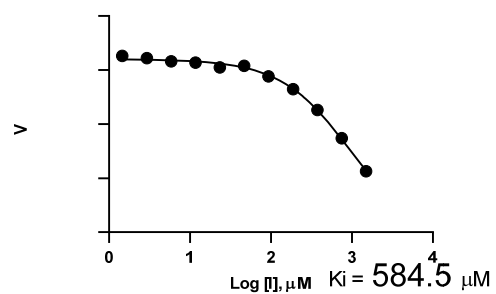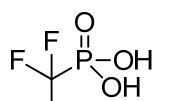

**12d**

Average  $K_i = 200 \mu\text{M}$

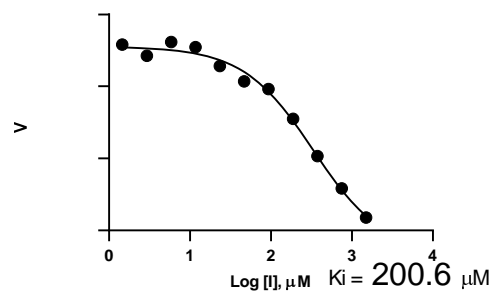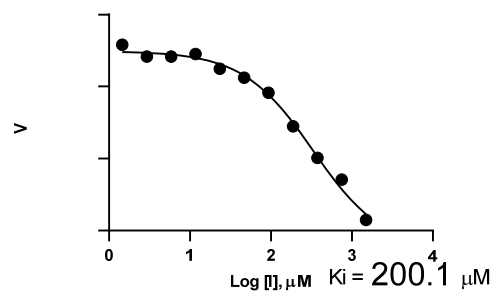

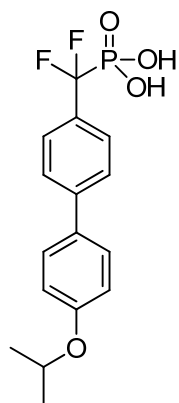

**12e**  
Average  $K_i = 231 \mu\text{M}$

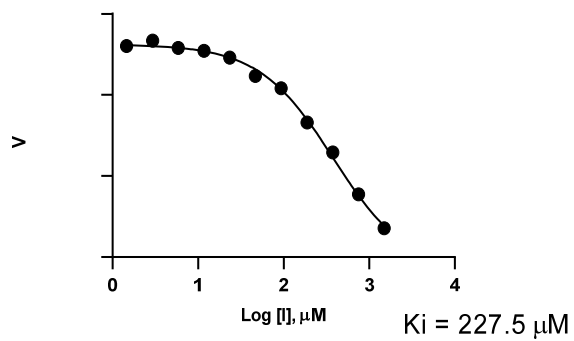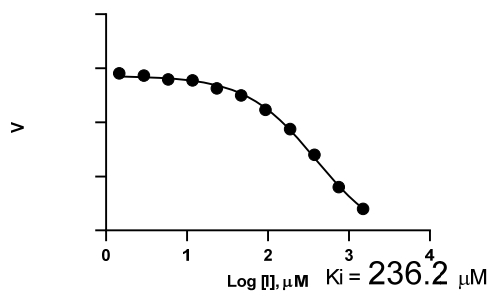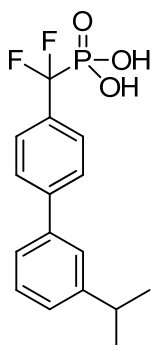

**12f**  
Average  $K_i = 132 \mu\text{M}$

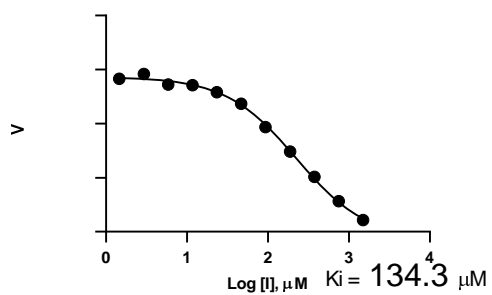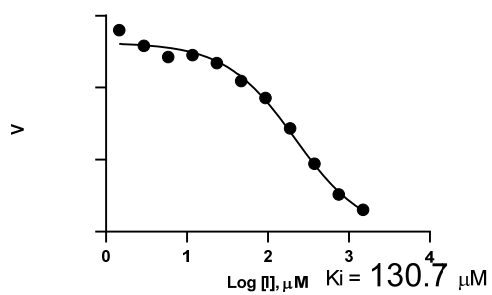

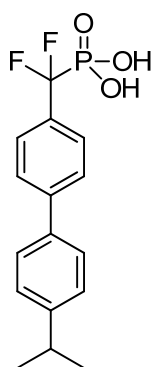

**12g**

Average  $K_i = 184 \mu\text{M}$

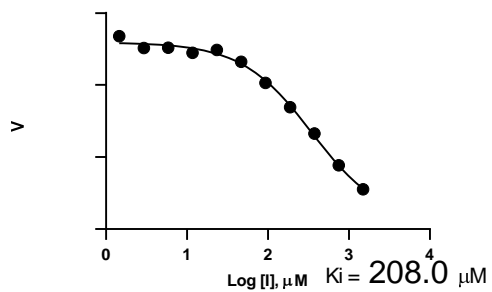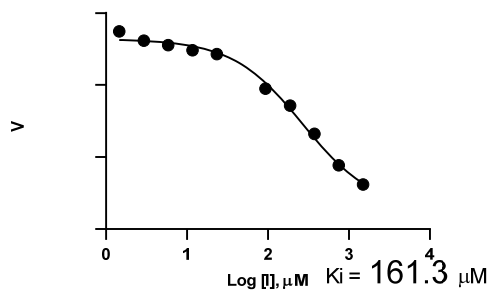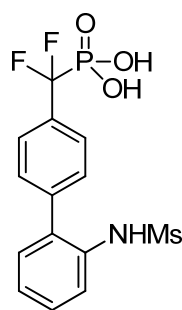

**12h**

Average  $K_i = 673 \mu\text{M}$

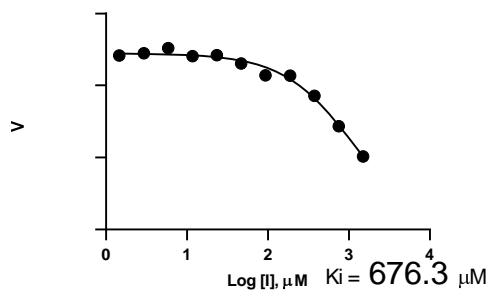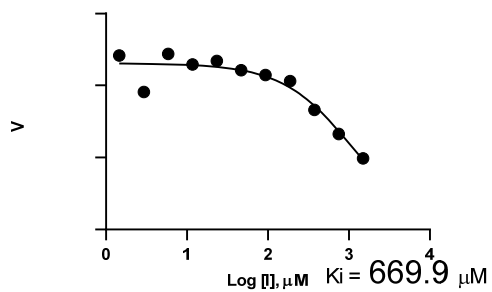

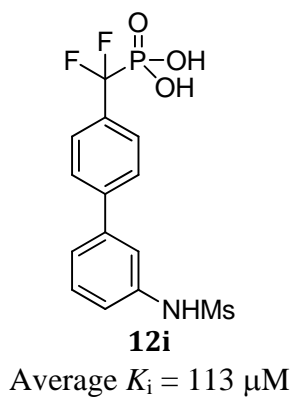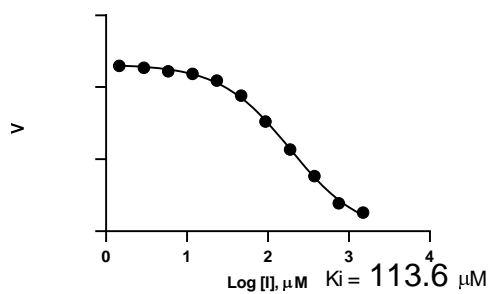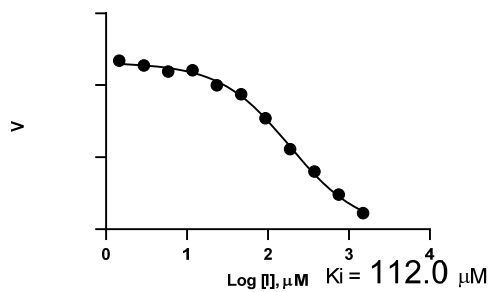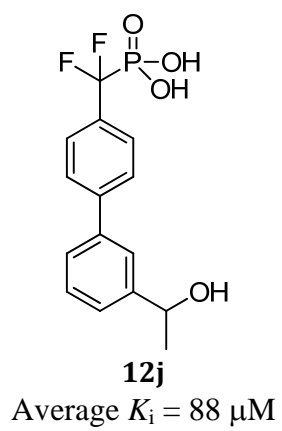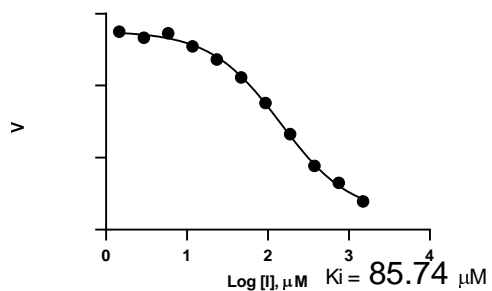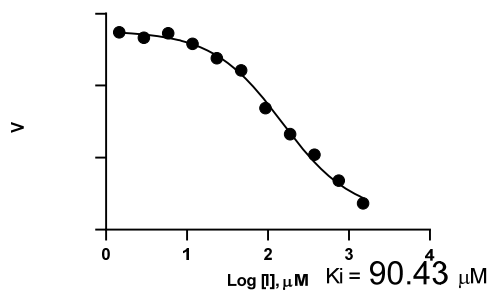

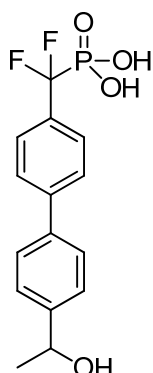

**12k**

Average  $K_i = 450 \mu\text{M}$

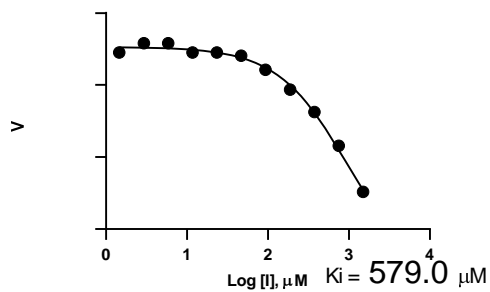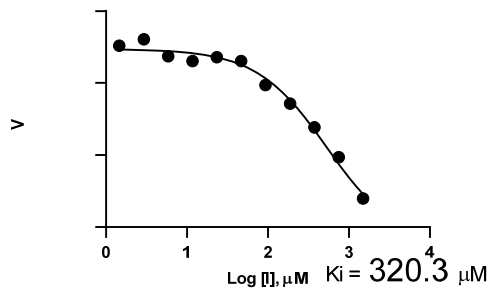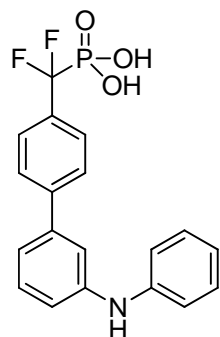

**12l**

Average  $K_i = 112 \mu\text{M}$

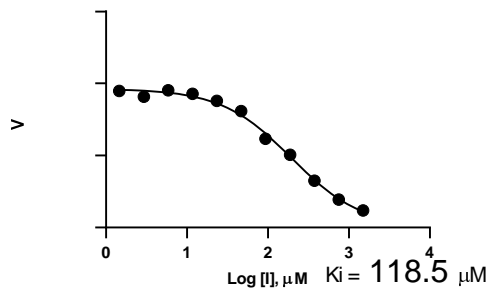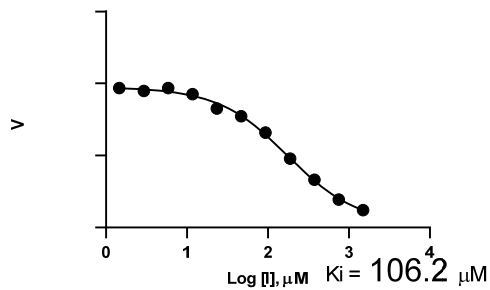



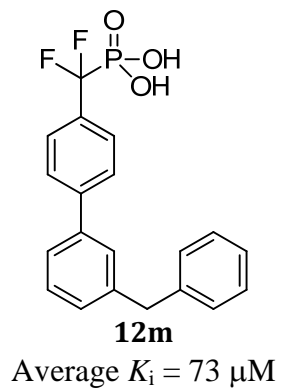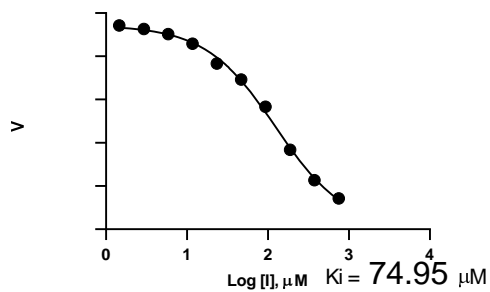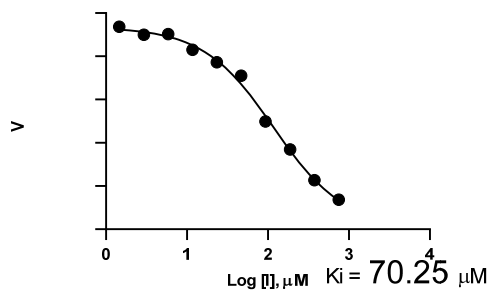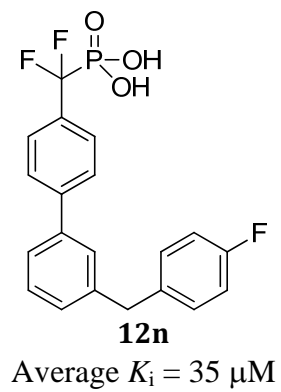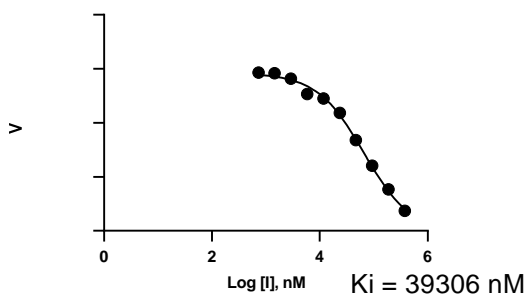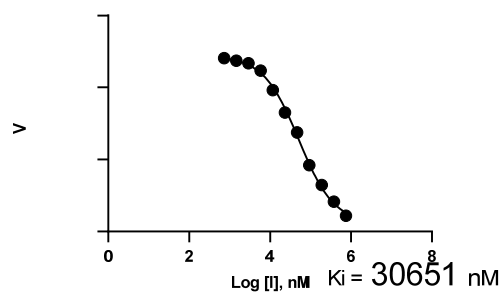

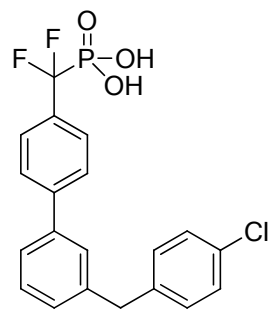

**12o**  
Average  $K_i = 19 \mu\text{M}$

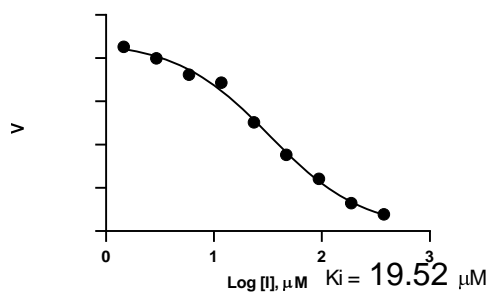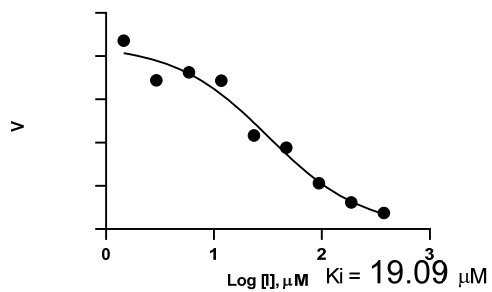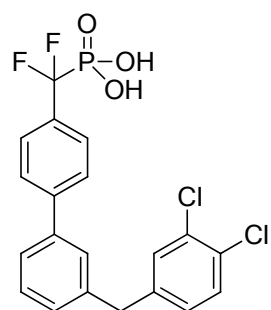

**12p**  
Average  $K_i = 9.6 \mu\text{M}$

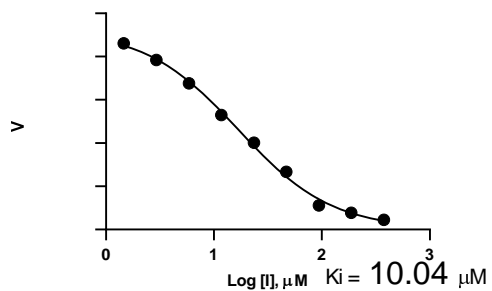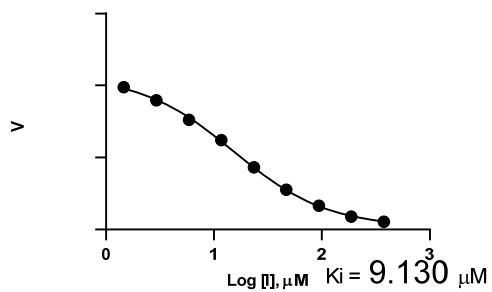

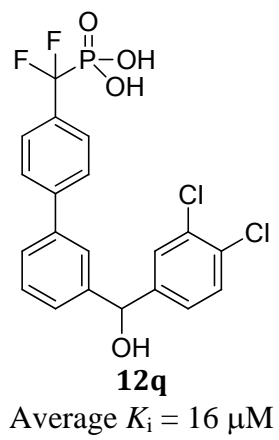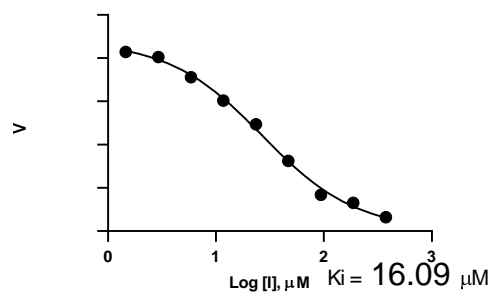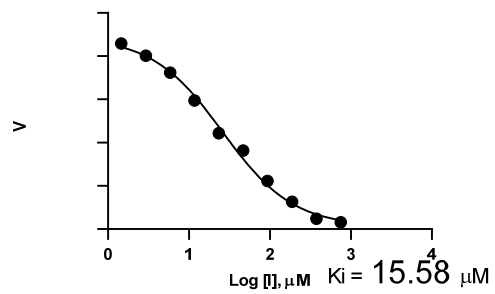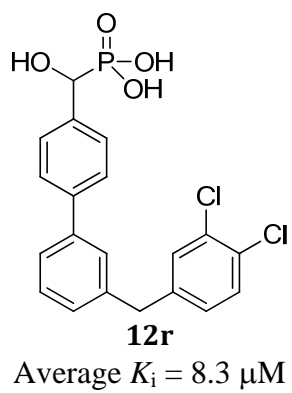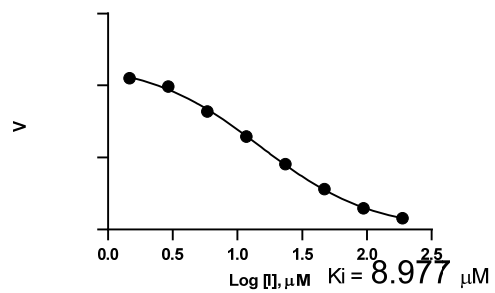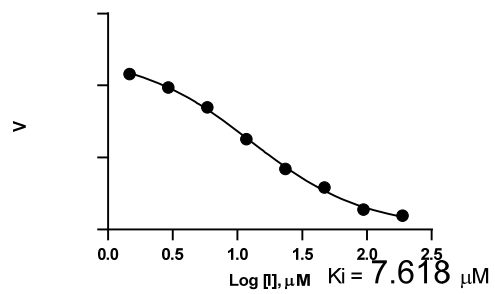

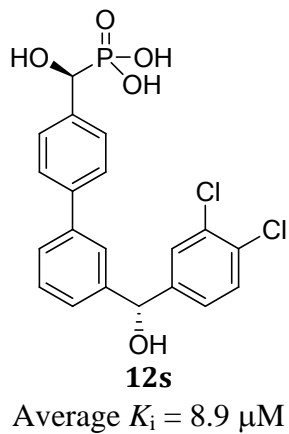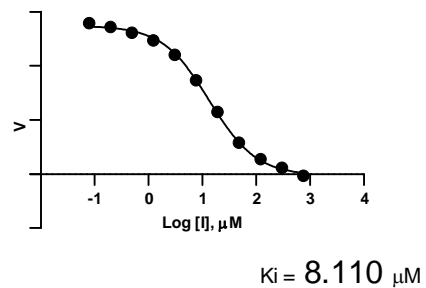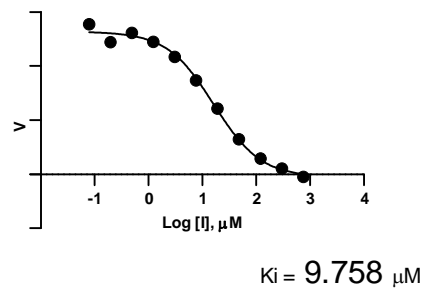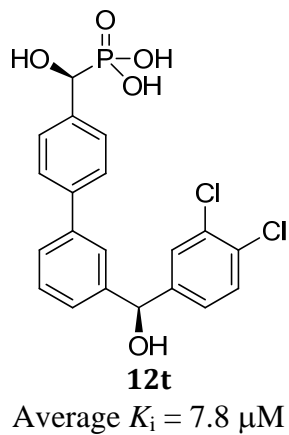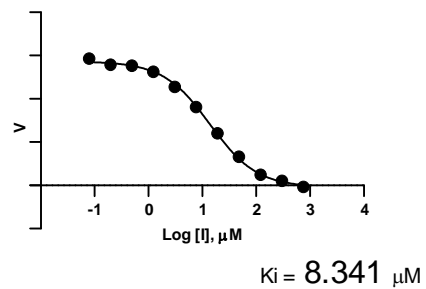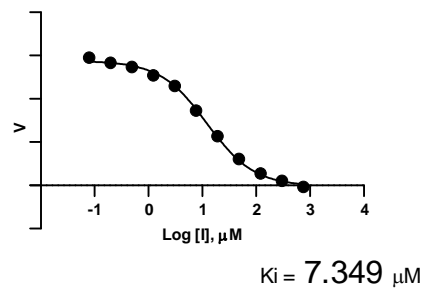

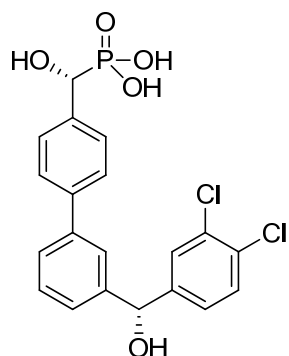

**12u**

Average  $K_i = 82 \mu\text{M}$

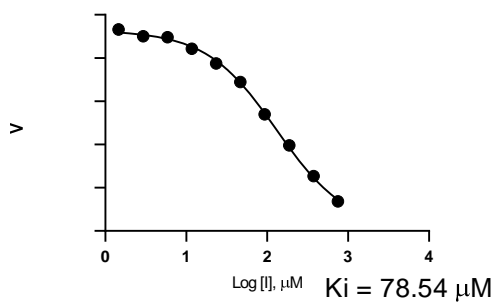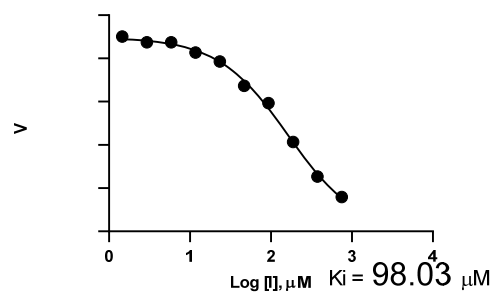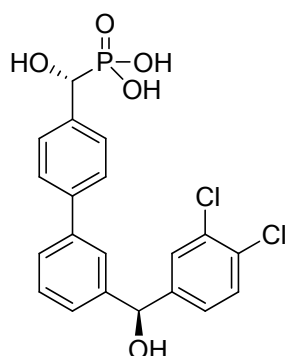

**12v**

Average  $K_i = 93 \mu\text{M}$

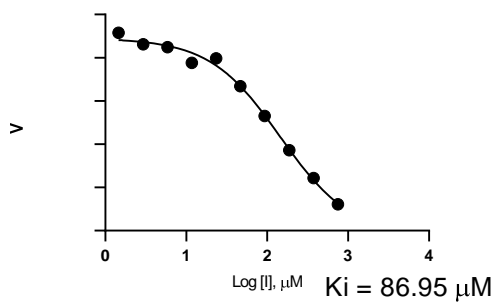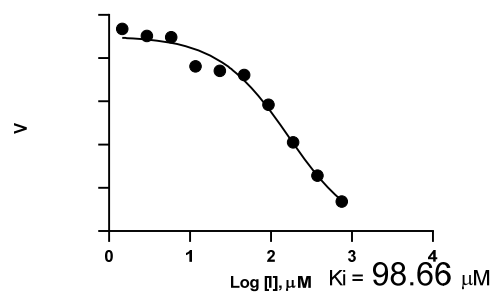

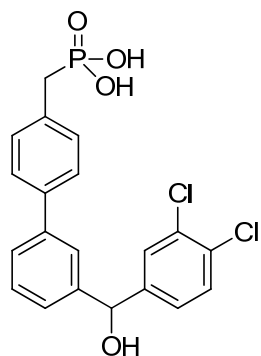

**12w**  
Average  $K_i = 97 \mu\text{M}$

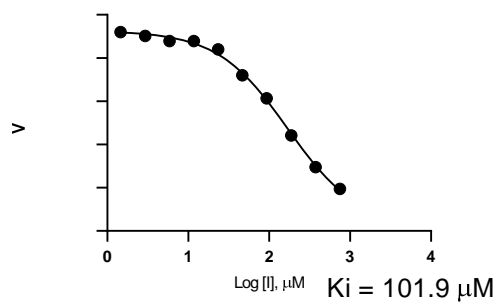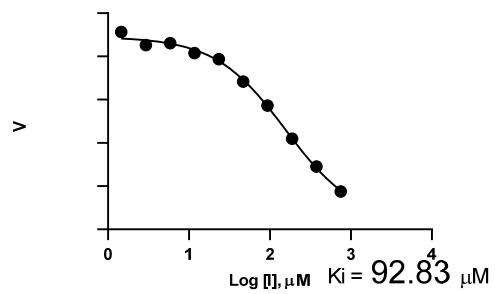

## 2. NMR spectra.

Inhibitor 12s:

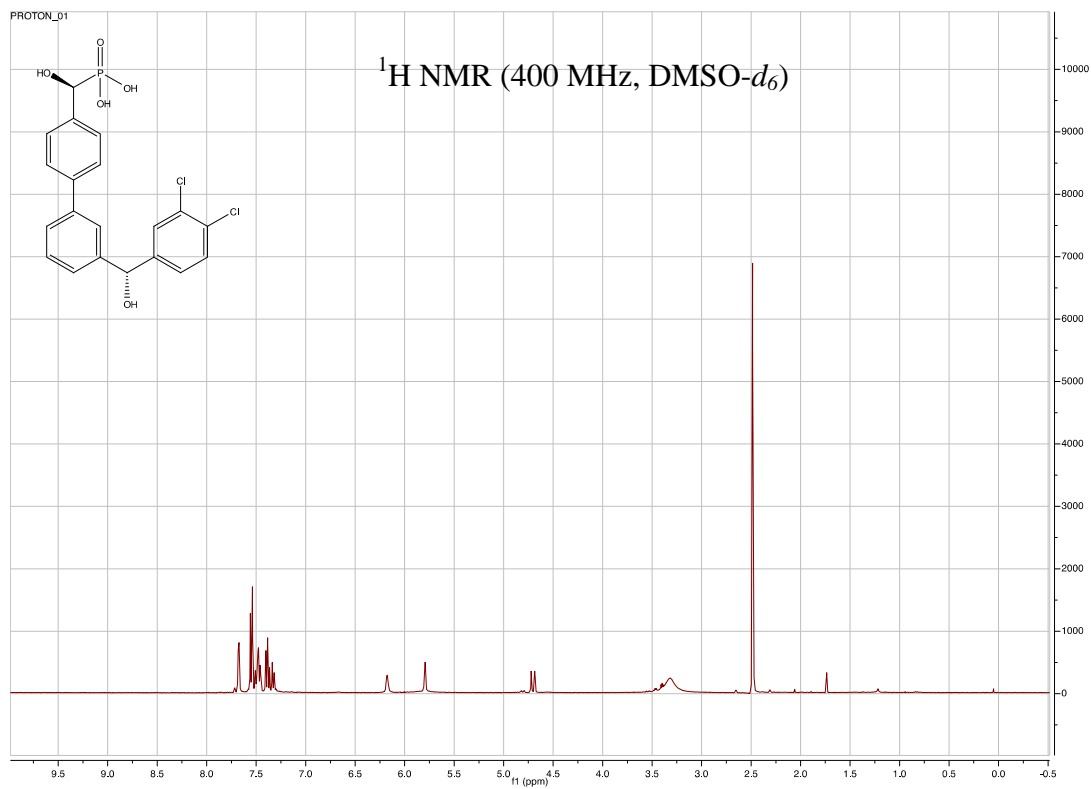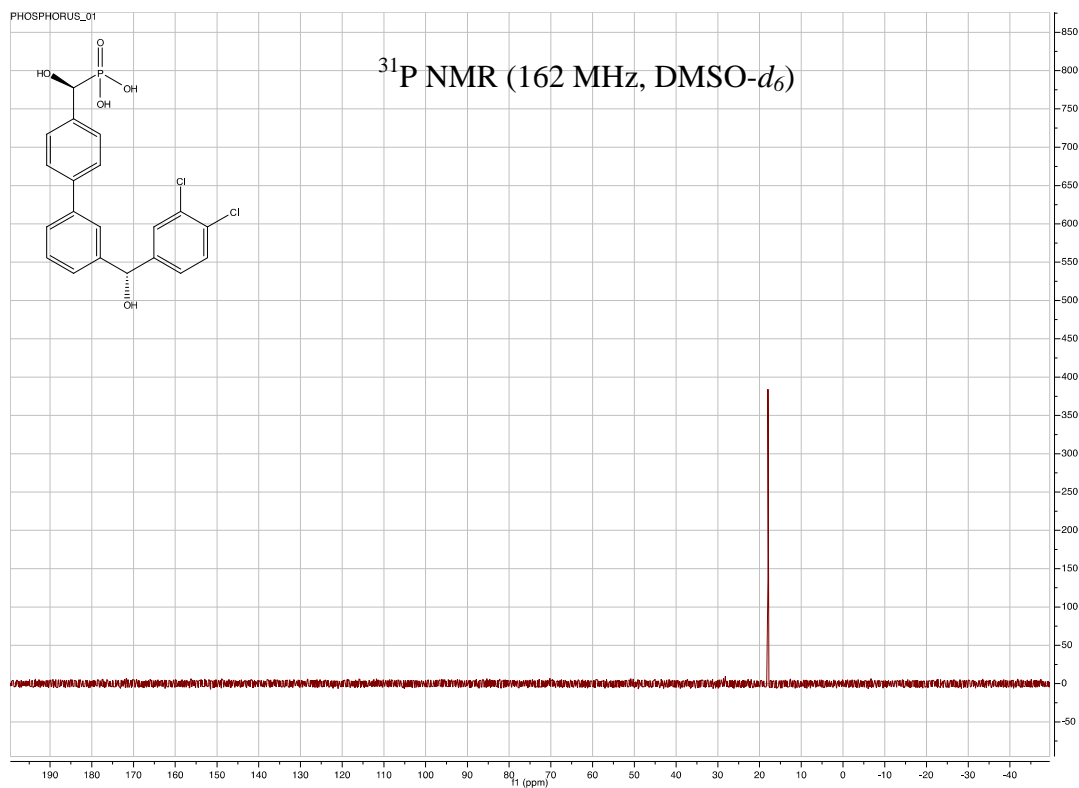

# Inhibitor 12t:

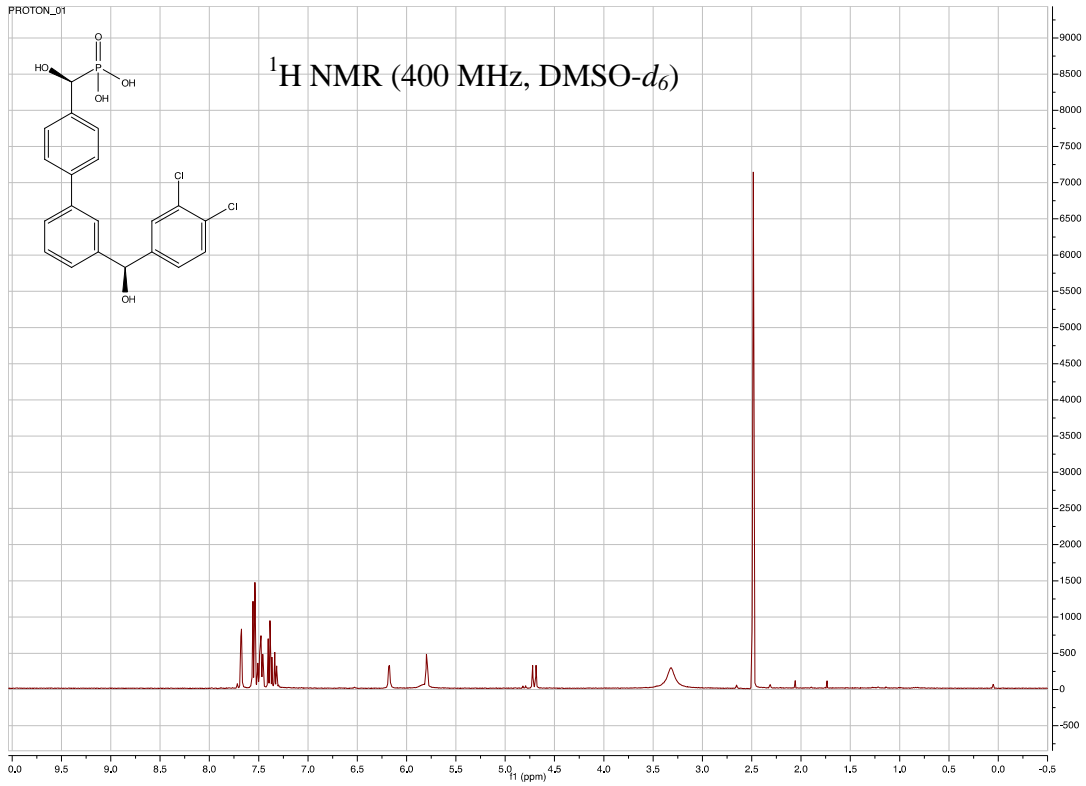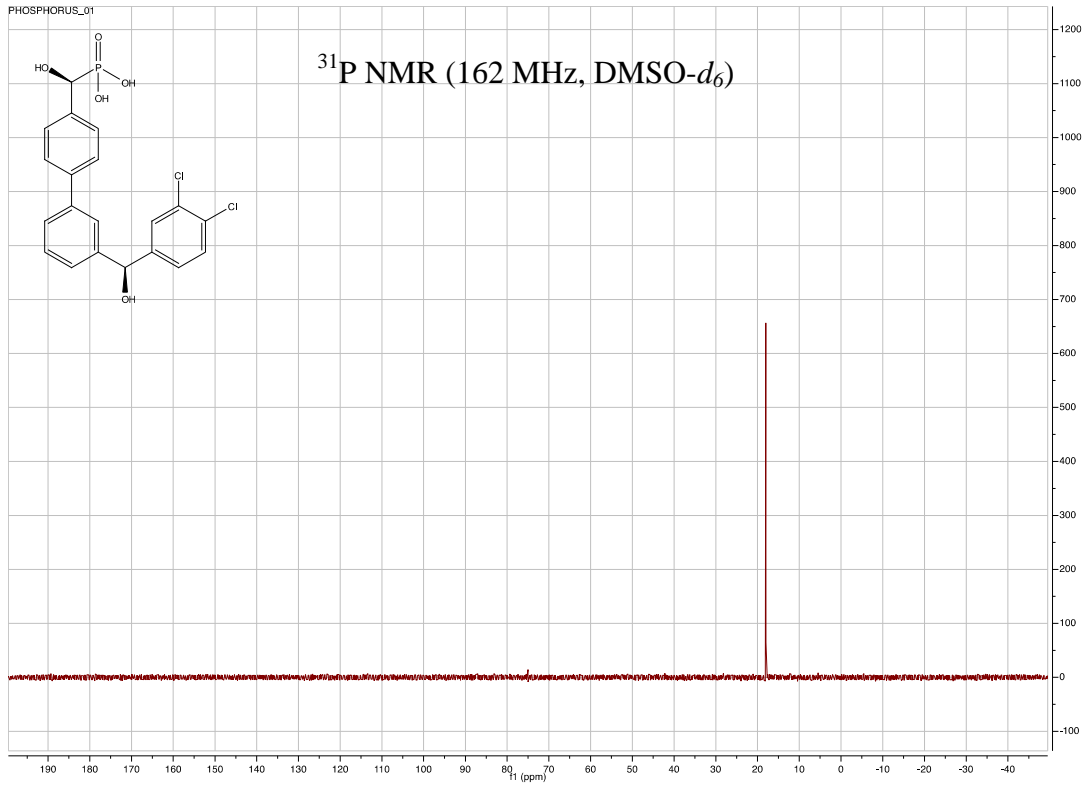



### 3. Table of primary and secondary antibodies used in this study.

| <b>Antibody</b>                     | <b>Format</b>                          | <b>Immunogen</b>                             | <b>Host</b> | <b>Dilution</b> | <b>Source</b>                                |
|-------------------------------------|----------------------------------------|----------------------------------------------|-------------|-----------------|----------------------------------------------|
| Anti-pTyr <sup>1472</sup><br>GluN2B | Whole IgG,<br>unconjugated             | Synthetic<br>phosphopeptide                  | Rabbit      | 1:1000          | Cell Signaling<br>Technology,<br>Danvers, MA |
| Anti-<br>GluN2B                     | Whole IgG,<br>unconjugated             | C-terminus of<br>mouse GluN2B                | Rabbit      | 1:1000          | Cell Signaling<br>Technology                 |
| Anti-pTyr <sup>402</sup><br>Pyk2    | Whole IgG,<br>unconjugated             | Synthetic<br>phosphopeptide<br>of human Pyk2 | Rabbit      | 1:1000          | Invitrogen                                   |
| Anti-Pyk2                           | IgG2a                                  | C-terminus of<br>human Pyk2                  | Mouse       | 1:1000          | Cell Signaling<br>Technology                 |
| Anti-pTyr <sup>204</sup><br>ERK1/2  | Whole IgG,<br>unconjugated             | Synthetic<br>phosphopeptide                  | Mouse       | 1:500           | Santa Cruz<br>Biotechnology                  |
| Anti-ERK2                           | Whole IgG,<br>unconjugated             | C-terminus of<br>rat p44 MAP<br>Kinase       | Rabbit      | 1:20,000        | Cell Signaling<br>Technology                 |
| Anti-<br>GAPDH,<br>clone 6c5        | IgG1,<br>unconjugated                  | Purified protein<br>from rabbit<br>muscle    | Mouse       | 1:20,000        | Millipore                                    |
| Anti-rabbit                         | Whole IgG<br>peroxidase-<br>conjugated | Rabbit Fc                                    | Donkey      | 1:10,000        | Amersham<br>Biosciences                      |
| Anti-mouse                          | Whole IgG<br>peroxidase-<br>conjugated | Mouse Fc                                     | Sheep       | 1:5,000         | Amersham<br>Biosciences                      |

#### 4. BBB PAMPA results.

BBB PAMPA studies were conducted by Pion, Inc (Billerica, MA) at pH 7.4. The refined effective permeability ( $P_e$ ) value obtained (average of triplicates) is summarized in the table along with results for internal highly and low permeable standards – propranolol and atenolol respectively.

| Compound      | Avg. $P_e$<br>( $10^{-6}$ cm/s) <sup>a</sup> | SD $P_e$ | Avg.<br>%R <sup>b</sup> | SD<br>%R | Avg.<br>log $P_e$ | SD<br>log $P_e$ | Domain,<br>nm |
|---------------|----------------------------------------------|----------|-------------------------|----------|-------------------|-----------------|---------------|
| Inhibitor 12s | <0.1                                         |          | 4                       | 0        |                   |                 | 260-350       |
| propranolol   | 68                                           | 5        | 48                      | 3        | -4.17             | 0.03            | 250-498       |
| atenolol      | <0.4                                         |          | 1                       | 1        |                   |                 | 250-498       |

<sup>a</sup>effective permeability measured in assay, results indicated with a “<” sign mean no quantifiable UV signal was detected in the acceptor compartments

<sup>b</sup>membrane retention
